# Supplementary material for: Real-World Insights into Evolocumab Use in Patients with Hyperlipidemia Across Five Countries: Analysis from the ZERBINI Study
Source: Springer Nature journal article supplement (doi:10.1007/s40119-023-00334-5), 2023-10-07
Supplement: MOESM1 [file 26139078]

**Title:** Real-world Insights into Evolocumab Use in Patients with Hyperlipidemia Across Five Countries: Analysis from the ZERBINI Study

**Authors:** Milan Gupta, MD;<sup>a</sup> Rajvi J. Wani, PhD, MS;<sup>b</sup> Khalid Al Faraidy, MD;<sup>c</sup> Jean Bergeron, MD, MSc;<sup>d</sup> Eduardo Contreras, MD;<sup>e</sup> Angel Alberto Garcia Peña, MD;<sup>f</sup> G. B. John Mancini, MD;<sup>g</sup> Francisco Padilla, MD;<sup>h</sup> Abel Alberto Pavia Lopez, MD;<sup>i</sup> Kiran Philip, MD, MBA;<sup>j</sup> Johnny Wu, MS, MA;<sup>j</sup> Erin S. Mackinnon, PhD<sup>b</sup>

**Affiliations:**

<sup>a</sup>Department of Medicine, University of Toronto & the Canadian Collaborative Research Network, 3 Conestoga Dr., Suite 200, Brampton, ON, L6Z 4N5, Canada

<sup>b</sup>Amgen Canada Inc., 6775 Financial Dr., #300, Mississauga, ON, L5N 0A4, Canada

<sup>c</sup>Interventional Cardiology, King Fahad Military Medical City, Main Hospital Building No 111, Abqaiq Rd., ICT Department PO Box 946, Dhahran, 31932 Saudi Arabia

<sup>d</sup>Departments of Medicine and of Laboratory Medicine, Centre Hospitalier Universitaire de Québec-Université Laval, 2705 boulevard Laurier, C-00-224, Québec, Québec, G1V 4G2, Canada

<sup>e</sup>Clinica de Occidente – Angiografía de Occidente, Cl. 18 Nte. #5-34, San Vicente, Cali, Valle del Cauca, Colombia

<sup>f</sup>Division of Cardiology, Hospital Universitario San Ignacio, Pontificia Universidad Javeriana, Cra 7° #40-62, Bogotá, Colombia

<sup>g</sup>Centre for Cardiovascular Innovation, Division of Cardiology, Department of Medicine, University of British Columbia, 6<sup>th</sup> floor, 2635 Laurel St., Vancouver, BC, V5Z 1M9, Canada

<sup>h</sup>Clinical and Interventional Research, Cardiovascular Center Chapalita, TARASCOS 3469-517  
Guadalajara, Jalisco, Mexico

<sup>i</sup>Clinical and Interventional Cardiology, Centro Medico ABC, Sur 136 No. 116, Col. Las  
Americas, Alvaro Obregon, 01120, Mexico City, Mexico

<sup>j</sup>Amgen Inc., One Amgen Center Drive, Thousand Oaks, California, CA, 91320, USA

**Corresponding author:** Erin S. Mackinnon: [emackinn@amgen.com](mailto:emackinn@amgen.com), +1-(647) 919-0453  
6775 Financial Dr., Suite 300, Mississauga, ON L5N 0A4

## **Supplementary Information**

**Table S1:** ZERBINI Study Investigators

**Table S2:** Reimbursement Criteria for Evolocumab per Country Included in the ZERBINI Study

**Table S3:** Sensitivity Analysis of LDL-C Outcomes in Evolocumab Completers vs. the Full Cohort

**Table S4:** Lipid-lowering Therapy Usage at Baseline Across Studied Countries

**Table S5:** LDL-C Measurement Incidence & Characteristics Over Study Period

**Table S6:** LDL-C Reductions from Baseline Over Study Period in the Full Study Cohort (N=417)<sup>a</sup>

**Table S7:** Treatment Emergent Adverse Drug Reactions by System Organ Class and Preferred Term in Descending Frequency (N=579)

**Table S8:** Full List of Ethics Committees

**Figure S1:** ZERBINI Study Patient Sample Size Flowchart

**Figure S2:** Study Schema

**Figure S3:** Median LDL-C Concentrations at Baseline and Over Study Period in the Full Study Cohort (N=215)\*

**Figure S4:** Median LDL-C Concentrations at Baseline and Follow-up in Patients on Evolocumab Monotherapy (N=63)\*

## Supplementary Material

**Table S1: ZERBINI Study Investigators**

| Country  | Name                             | Institution and City                                                                                     |
|----------|----------------------------------|----------------------------------------------------------------------------------------------------------|
| Canada   | Hoag, Gordon, N                  | Discovery Clinical Services, Victoria                                                                    |
|          | Mancini, Giovanni Battista John  | Centre for Cardiovascular Innovation - The University of British Columbia (UBC), Vancouver               |
|          | Manjoo, Priya                    | Victoria Endocrinology, Victoria                                                                         |
|          | Ahooja, Vineeta                  | Heart Health Institute, Scarborough                                                                      |
|          | Curnew, Gregory, P               | Dr. Greg Curnew MD, Office of, Hamilton                                                                  |
|          | Gupta, Milan, K                  | Brampton Research Associates, Brampton                                                                   |
|          | McPherson, Phyllis Ruth          | University of Ottawa - Heart Institute (UOHI) (Institut de Cardiologie de L'Universite d'Ottawa), Ottawa |
|          | Pandey, A. Shekhar               | Cambridge Cardiac Care Centre, Cambridge                                                                 |
|          | Bergeron, Jean                   | Clinique des maladies lipidiques de Québec (CMLQ Inc.), Québec City                                      |
|          | Gaudet, Daniel                   | ECOGENE-21, Chicoutimi                                                                                   |
|          | Hamet, Pavel                     | Clinique de recherche Medpharmgene, Montréal                                                             |
|          | Tsoukas, George, M               | Applied Medical Informatics Research Inc. (A.M.I.R.), Montréal                                           |
| Colombia | Leal, Janeth                     | IPS Universitaria, Servicios de Salud, Universidad de Antioquia, Medellin                                |
|          | Roman Gonzalez, Alejandro        | Hospital Universitario San Vicente De Paul, Medellin                                                     |
|          | Martinez, Erika                  | Colsanitas, Barranquilla                                                                                 |
|          | Manzur Jattin, Fernando Gabriel  | Centro de Diagnostico Cardiologico LTDA, Cartagena                                                       |
|          | Hoyos Perez, Carlos Arturo       | Asociacion IPS Medicos Internistas de Caldas, Manizales                                                  |
|          | Burgos Martinez, Eduardo Antonio | FUNCENTRA IPS Fundacion centro de excelencia en enfermedades cronicas no transmisibles, Monteria         |
|          | Alberto Garcia, Angel            | Hospital Universitario San Ignacio, Bogota                                                               |
|          | Gomez Lopez, Efrain Alonso       | Fundacion Clinica Abood-Shaio / Fundacion Abbod Shaio, Bogota                                            |
|          | Lugo Pena, Julian Rodrigo        | Clinicos IPS, Bogota                                                                                     |
|          | Roncancio, Heidy                 | Cardiocolombia, Bogota                                                                                   |
|          | Trout Guardiola, Guillermo, O    | T Y C Inversiones S A S, Santa Marta                                                                     |
|          | Marin Sanchez, Alejandro         | Megacentro Pinares, Pereira                                                                              |
|          | Contreras Zuniga, Eduardo        | Clinica Occidente Cali, Cali                                                                             |
|          | Vesga, Carlos                    | Fundacion Valle del Lili, Cali                                                                           |
| Kuwait   | Akbar, Mousa                     | Al Sabah Hospital, Safat                                                                                 |
|          | AlDashti, Rajaa                  | Al-Amiri Hospital (Sabah AlAhmed Cardiac Center), Kuwait City                                            |

|                     |                                   |                                                                                           |
|---------------------|-----------------------------------|-------------------------------------------------------------------------------------------|
|                     | AlJarallah, Mohamed               | Al-Amiri Hospital (Sabah AlAhmed Cardiac Center), Kuwait City                             |
| <b>Mexico</b>       | Llamas Esperon, Guillermo Antonio | Hospital Cardiologica Aguescalientes, Aguascalientes                                      |
|                     | Munoz Beltran, Leocadio Gerardo   | Hospital Angeles Ciudad Juarez / Private office, Ciudad Juarez                            |
|                     | Nevarez Ruiz, Luis Alejandro, A   | Investigacion en Salud y Metabolismo S.C., Chihuahua                                      |
|                     | Robles Ramirez, Carlos            | Hospital Angeles Torreon, Torreón                                                         |
|                     | Pavia Lopez, Abel Alberto         | Sanatorio Durango, Mexico City                                                            |
|                     | Sierra Galan, Lilia Mercedes      | Hospital ABC Santa Fe, Mexico City                                                        |
|                     | Padilla Padilla, Francisco, G     | Centro Francisco Gerardo Padilla Padilla Cardiología Clínica e Intervención., Guadalajara |
|                     | Salas Llamas, Jose Pascual        | Centro Diagnostico Cardiovascular, Guadalajara                                            |
|                     | Guadarrama Arasi, Jose Luis       | Centro Medico Toluca, Barrio San                                                          |
|                     | Sauque Reyna, Leobardo            | Instituto de Diabetes, Obesidad y Nutricion S.C. Coordinacion, Cuernavaca                 |
|                     | Garcia Cantu, Elias Alberto       | Centro de Investigacion Clinica Aplicada, Monterrey,                                      |
|                     | Garcia Castillo, Armando          | Cardiolink Clin Trials, S.C., Monterrey                                                   |
|                     | Garcia Hernandez, Pedro Alberto   | Hospital Universitario Dr Jose E Gonzalez, Monterrey                                      |
|                     | Alcocer Gamba, Marco, A           | Centro de Estudios Clinicos de Queretaro (CECLIQ), Queretaro                              |
| <b>Saudi Arabia</b> | AlFaraidy, Khaled                 | King Fahad Military Medical Complex in Dhahran, Dhahran                                   |
|                     | AlShehri, Mohamed                 | Khamis Meshhet Military Hospital, Khamis Mesheet                                          |
|                     | AlQudaimi, Ahmed                  | Saud Albabtain Cardiac Center, Dammam                                                     |
|                     | AlNouri, Fahad                    | Prince Sultan Cardiac Center, Riyadh                                                      |
|                     | Awan, Zuhier                      | King Abdulaziz University Hospital, Jeddah                                                |
|                     | Hussein Abdeen, Gamal             | North West Armed Forces King Salman Hospital, Tabuk                                       |

**Table S2: Reimbursement Criteria for Evolocumab per Country Included in the ZERBINI Study**

| Country             | Reimbursement in primary prevention patients (FH)                                                                                                                                                                                                                                                                                                                                                                                                                                                                                                                                                                | Reimbursement in secondary prevention patients (established ASCVD)                                                                                                                                                                                                       |
|---------------------|------------------------------------------------------------------------------------------------------------------------------------------------------------------------------------------------------------------------------------------------------------------------------------------------------------------------------------------------------------------------------------------------------------------------------------------------------------------------------------------------------------------------------------------------------------------------------------------------------------------|--------------------------------------------------------------------------------------------------------------------------------------------------------------------------------------------------------------------------------------------------------------------------|
| <b>Canada</b>       | <p>HeFH:</p> <ul style="list-style-type: none"> <li>• LDL-C <math>\geq</math>2.0 mmol/L for secondary prevention or &lt;50% reduction from untreated baseline, after: <ul style="list-style-type: none"> <li>○ Maximally tolerated dose of statins + ezetimibe, OR</li> <li>○ Ezetimibe for at least 3 months or documented statin intolerance</li> </ul> </li> <li>• Public access in all provinces and private reimbursement.</li> </ul> <p>HoFH:</p> <ul style="list-style-type: none"> <li>• After last 2 lipid-lowering therapies.</li> <li>• Public (1/10 provinces) and private reimbursement.</li> </ul> | <ul style="list-style-type: none"> <li>• ASCVD on maximally tolerated dose of statins or with documented statin intolerance with LDL-C not at goal.</li> <li>• Covered by &gt;90% of private payers with no public access.</li> </ul>                                    |
| <b>Mexico</b>       | <ul style="list-style-type: none"> <li>• HeFH or HoFH on maximally tolerated dose of statins +/- ezetimibe with LDL-C not at goal.</li> <li>• Private and public (public limited at time of study).</li> </ul>                                                                                                                                                                                                                                                                                                                                                                                                   | <ul style="list-style-type: none"> <li>• ASCVD on maximally tolerated dose of statins +/- ezetimibe with LDL-C not at goal.</li> <li>• Private and public (public limited at time of study).</li> </ul>                                                                  |
| <b>Colombia</b>     | <ul style="list-style-type: none"> <li>• HeFH (adults) and HoFH (since 13 years) with LDL-C not at goal.</li> <li>• Covered by health system when HMO approves its use.</li> </ul>                                                                                                                                                                                                                                                                                                                                                                                                                               | <ul style="list-style-type: none"> <li>• ASCVD on maximally tolerated dose of statins +/- ezetimibe with LDL-C not at goal.</li> <li>• Covered by health system when HMO approves its use.</li> </ul>                                                                    |
| <b>Saudi Arabia</b> | <ul style="list-style-type: none"> <li>• HeFH or HoFH on maximally tolerated dose of statins +/- ezetimibe with LDL-C not at goal.</li> <li>• Covered by both government and private payers.</li> </ul>                                                                                                                                                                                                                                                                                                                                                                                                          | <ul style="list-style-type: none"> <li>• ASCVD on maximally tolerated dose of statins +/- ezetimibe with LDL-C not at goal (private institutions) and &gt;100 mg/dL (Ministry of Health hospitals).</li> <li>• Covered by both government and private payers.</li> </ul> |
| <b>Kuwait</b>       | <ul style="list-style-type: none"> <li>• HeFH or HoFH on maximally tolerated dose of statins +/- ezetimibe with LDL-C not at goal.</li> <li>• Covered by both government and private payers.</li> </ul>                                                                                                                                                                                                                                                                                                                                                                                                          | <ul style="list-style-type: none"> <li>• ASCVD on maximally tolerated dose of statins +/- ezetimibe with LDL-C not at goal and &gt;70 mg/dL.</li> <li>• Covered by both government and private payers.</li> </ul>                                                        |

ASCVD: atherosclerotic cardiovascular disease; HeFH: heterozygous familial hypercholesterolemia; HMO: Health

Maintenance Organization; HoFH: homozygous familial hypercholesterolemia; LDL-C: low-density lipoprotein

cholesterol.

**Table S3: Sensitivity Analysis of LDL-C Outcomes in Evolocumab Completers vs. the Full Cohort**

| Median (IQR) LDL-C Concentration in Patients with Both Baseline & 1-12 Month Follow-up Measures       | Completers <sup>a</sup> | Full Cohort <sup>b</sup> |
|-------------------------------------------------------------------------------------------------------|-------------------------|--------------------------|
|                                                                                                       | N=330                   | N=417                    |
| <b>Baseline</b>                                                                                       |                         |                          |
| mmol/L                                                                                                | 3.5 (2.8-4.4)           | 3.6 (2.8-4.4)            |
| mg/dL                                                                                                 | 135.3 (108.3-170.2)     | 139.2 (108.3-170.2)      |
| <b>1-12 months follow-up</b>                                                                          |                         |                          |
| mmol/L                                                                                                | 1.3 (0.9-2.1)           | 1.0 (0.6-1.8)            |
| mg/dL                                                                                                 | 50.3 (34.8-81.2)        | 38.7 (23.2-69.6)         |
| Median (IQR) LDL-C Concentration in Patients with Baseline, 1-6 Month & 7-12 Month Follow-up Measures | N=170                   | N=215                    |
| <b>Baseline</b>                                                                                       |                         |                          |
| mmol/L                                                                                                | 3.7 (2.9-4.6)           | 3.7 (2.9-4.5)            |
| mg/dL                                                                                                 | 143.1 (112.1-177.9)     | 143.1 (112.1-174.0)      |
| <b>1-6 months follow-up</b>                                                                           |                         |                          |
| mmol/L                                                                                                | 1.3 (0.7-2.0)           | 1.1 (0.7-1.8)            |
| mg/dL                                                                                                 | 50.3 (27.1-77.3)        | 42.5 (27.1-69.6)         |
| <b>7-12 months follow-up</b>                                                                          |                         |                          |
| mmol/L                                                                                                | 1.4 (0.8-2.1)           | 1.3 (0.8-2.2)            |
| mg/dL                                                                                                 | 54.1 (30.9-81.2)        | 50.3 (30.9-85.1)         |

<sup>a</sup>Data represent patients who remained on evolocumab at the end of the 12-month study follow-up period, with an LDL-C measure at baseline (measured within 6 months prior to initiation of evolocumab) and their mean LDL-C measure during the indicated follow-up timeframes; <sup>b</sup>Data represent patients with an LDL-C measure at baseline (measured within 6 months prior to initiation of evolocumab) and their minimum LDL-C measure during the indicated timeframes over the 12-month follow-up period.

IQR: interquartile range; LDL-C: low-density lipoprotein cholesterol.

**Table S4: Lipid-lowering Therapy Usage at Baseline Across Studied Countries**

| LLT<br>n (%)                                         | Overall<br>(N=578) | North<br>America  |                   | South<br>America    | Middle East                |                  |
|------------------------------------------------------|--------------------|-------------------|-------------------|---------------------|----------------------------|------------------|
|                                                      |                    | Canada<br>(N=131) | Mexico<br>(N=108) | Colombia<br>(N=114) | Saudi<br>Arabia<br>(N=155) | Kuwait<br>(N=70) |
| <b>Statin<sup>a</sup></b>                            | 437 (75.6)         | 73 (55.7)         | 64 (59.3)         | 93 (81.6)           | 147 (94.8)                 | 60 (85.7)        |
| <b>Ezetimibe<br/>(without statin)</b>                | 39 (6.7)           | 19 (14.5)         | 3 (2.8)           | 13 (11.4)           | 3 (1.9)                    | 1 (1.4)          |
| <b>Ezetimibe + statin</b>                            | 168 (29.1)         | 51 (38.9)         | 8 (7.4)           | 50 (43.9)           | 45 (29.0)                  | 14 (20.0)        |
| <b>Bile acid sequestrant</b>                         | 16 (2.8)           | 14 (10.7)         | 0 (0.0)           | 2 (1.8)             | 0 (0.0)                    | 0 (0.0)          |
| <b>Other LLT<sup>b</sup></b>                         | 25 (4.3)           | 4 (3.1)           | 9 (8.3)           | 5 (4.4)             | 1 (0.6)                    | 6 (8.6)          |
| <b>Reported statin<br/>intolerance</b>               | 206 (35.6)         | 81 (61.8)         | 48 (44.4)         | 39 (34.2)           | 12 (7.7)                   | 26 (37.1)        |
| <b>Number of statins<br/>reported intolerant to:</b> | <b>(N=206)</b>     | <b>(N=81)</b>     | <b>(N=48)</b>     | <b>(N=39)</b>       | <b>(N=12)</b>              | <b>(N=26)</b>    |
| 1                                                    | 119 (57.8)         | 27 (33.3)         | 43 (89.6)         | 17 (43.6)           | 12 (100)                   | 20 (76.9)        |
| 2                                                    | 39 (18.9)          | 21 (25.9)         | 3 (6.3)           | 10 (25.6)           | 0 (0.0)                    | 5 (19.2)         |
| 3                                                    | 35 (17.0)          | 23 (28.4)         | 2 (4.2)           | 9 (23.1)            | 0 (0.0)                    | 1 (3.8)          |
| ≥4                                                   | 13 (6.3)           | 10 (12.3)         | 0 (0.0)           | 3 (7.7)             | 0 (0.0)                    | 0 (0.0)          |

<sup>a</sup>Any patient on a statin; <sup>b</sup>Other LLT included Epacor, Fibrates, and Niacin.

LLT: Lipid-lowering therapy.



**Table S5: LDL-C Measurement Incidence & Characteristics Over Study Period**

| <b>Incidence of LDL-C Measurements</b>                                         | <b>N=578<br/>n (%)</b> |
|--------------------------------------------------------------------------------|------------------------|
| <b>Baseline LDL-C measurement<sup>a</sup></b>                                  |                        |
| Yes                                                                            | 539 (93.3)             |
| No                                                                             | 39 (6.7)               |
| <b>≥1 follow-up LDL-C measurement<sup>b</sup></b>                              |                        |
| Yes                                                                            | 445 (77.0)             |
| No                                                                             | 133 (23.0)             |
| <b>Median (IQR) number of LDL-C measurements</b>                               | 1 (1-2)                |
| <b>Follow-up LDL-C Measurement Characteristics</b>                             | <b>N=445</b>           |
| <b>Median (IQR) number of LDL-C measurements</b>                               | 2 (1-3)                |
| <b>Frequency of LDL-C measurements, n (%)</b>                                  |                        |
| 1                                                                              | 174 (39.1)             |
| 2 <sup>b</sup>                                                                 | 129 (29.0)             |
| ≥3 <sup>b</sup>                                                                | 142 (31.9)             |
| <b>Median (IQR) days from evolocumab initiation to LDL-C measurement, days</b> |                        |
| First measure                                                                  | 87 (46-148)            |
| Last measure                                                                   | 247 (153-315)          |

<sup>a</sup>The last LDL-C measured within six months prior to initiation of evolocumab was regarded as the baseline LDL-C;

<sup>b</sup>In patients with multiple LDL-C measures during the 12-month follow-up period, their minimum value was used for analysis.

IQR: interquartile range; LDL-C: low-density lipoprotein cholesterol.

**Table S6: LDL-C Reductions from Baseline Over Study Period in the Full Study Cohort (N=417)<sup>a</sup>**

| <b>LDL-C Reduction from Baseline</b> | <b>N=417<br/>n (%)</b> |
|--------------------------------------|------------------------|
| <b>≥30%</b>                          | 372 (89.2)             |
| <b>≥50%</b>                          | 317 (76.0)             |
| <b>≥80%</b>                          | 115 (27.6)             |
| <b>Any reduction</b>                 | 406 (97.4)             |
| <b>No reduction<sup>b</sup></b>      | 11 (2.6)               |

<sup>a</sup>Data represent patients with an LDL-C measure at baseline (measured within 6 months prior to initiation of evolocumab) and their minimum LDL-C measure during the 12-month study follow-up period; <sup>b</sup>Three of the 11 patients with no LDL-C reduction discontinued evolocumab and 1 patient missed 2 consecutive doses (28 days of no drug). 6 of the 11 patients had unknown FH status.

FH: familial hypercholesterolemia; LDL-C: low-density lipoprotein cholesterol.

**Table S7: Treatment Emergent Adverse Drug Reactions by System Organ Class and Preferred Term in Descending Frequency (N=579)**

| <b>System Organ Class<br/>Preferred Term</b>                | <b>Total (N = 579)<br/>n (%)</b> |
|-------------------------------------------------------------|----------------------------------|
| <b>Musculoskeletal and connective tissue disorders</b>      | <b>6 (1.0)</b>                   |
| Myalgia                                                     | 3 (0.5)                          |
| Arthralgia                                                  | 1 (0.2)                          |
| Back pain                                                   | 1 (0.2)                          |
| Muscle discomfort                                           | 1 (0.2)                          |
| <b>Nervous system disorders</b>                             | <b>6 (1.0)</b>                   |
| Dizziness                                                   | 4 (0.7)                          |
| Headache                                                    | 3 (0.5)                          |
| Balance disorder                                            | 1 (0.2)                          |
| <b>General disorders and administration site conditions</b> | <b>4 (0.7)</b>                   |
| Chest pain                                                  | 1 (0.2)                          |
| Fatigue                                                     | 1 (0.2)                          |
| Illness                                                     | 1 (0.2)                          |
| Puncture site haematoma                                     | 1 (0.2)                          |
| <b>Respiratory, thoracic and mediastinal disorders</b>      | <b>4 (0.7)</b>                   |
| Catarrh                                                     | 1 (0.2)                          |
| Dyspnoea                                                    | 1 (0.2)                          |
| Sinus congestion                                            | 1 (0.2)                          |
| Throat irritation                                           | 1 (0.2)                          |
| <b>Infections and infestations</b>                          | <b>3 (0.5)</b>                   |
| Influenza                                                   | 2 (0.3)                          |
| Sinusitis                                                   | 1 (0.2)                          |
| <b>Skin and subcutaneous tissue disorders</b>               | <b>3 (0.5)</b>                   |
| Pruritus                                                    | 1 (0.2)                          |
| Rash                                                        | 1 (0.2)                          |
| Skin lesion                                                 | 1 (0.2)                          |
| <b>Gastrointestinal disorders</b>                           | <b>2 (0.3)</b>                   |
| Dyspepsia                                                   | 1 (0.2)                          |
| Nausea                                                      | 1 (0.2)                          |

**Table S8: Full List of Ethics Committees**

| Site Country | PI Full Name                     | Site No  | Site Member Organization                                                               | EC Full Name                                                                                               | Ethical Approval Numbers |
|--------------|----------------------------------|----------|----------------------------------------------------------------------------------------|------------------------------------------------------------------------------------------------------------|--------------------------|
| Colombia     | Burgos Martinez, Eduardo Antonio | 32730001 | FUNCENTRA IPS Fundacion centro de excelencia en enfermedades cronicas no transmisibles | Research Ethics Committee of the Mental Hospital of Antioquia E.S.E.                                       |                          |
| Colombia     | Gomez Lopez, Efrain Alonso       | 32730002 | Fundacion Clinica Abood-Shaio / Fundacion Abbod Shaio                                  | Research Ethics Committee Abood Shaio Foundation                                                           |                          |
| Colombia     | Leal, Janeth                     | 32730003 | IPS Universitaria, Servicios de Salud, Universidad de Antioquia                        | Universitaria IPS Research and Ethics Committee                                                            |                          |
| Colombia     | Roman Gonzalez, Alejandro        | 32730004 | Hospital Universitario San Vicente De Paul                                             | Research Ethics Committee San Vicente Paul Hospital Foundation                                             |                          |
| Colombia     | Vesga, Carlos                    | 32730007 | Fundacion Valle del Lili                                                               | Comite de Etica en Investigacion Biomedica of Fundacion Valle del Lili                                     |                          |
| Colombia     | Contreras Zuniga, Eduardo        | 32730010 | Clinica Occidente Cali                                                                 | Ethics Committee on Human Reasearch Angiografia de Occidente S.A.                                          |                          |
| Colombia     | Marin Sanchez, Alejandro         | 32730015 | Megacentro Pinares                                                                     | Comite Regional de Etica en Investigacion Clinica del Eje Cafetero (CREICEC)                               |                          |
| Colombia     | Alberto Garcia, Angel            | 32730017 | Hospital Universitario San Ignacio                                                     | Institutional Research and Ethics Committee of the Pontifical Xavierian University School of Medicine      |                          |
| Colombia     | Trout Guardiola, Guillermo, O    | 32730022 | T Y C Inversiones S A S                                                                | Research Ethics Committee of the Mental Hospital of Antioquia E.S.E.                                       |                          |
| Colombia     | Manzur Jattin, Fernando Gabriel  | 32730023 | Centro de Diagnostico Cardiologico LTDA                                                | El Comite de Etica en Investigacion del Centro de Diagnostico Cardiologico para la investigacion biomedica |                          |
| Colombia     | Martinez, Erika                  | 32730024 | Colsanitas                                                                             | El Comite de Etica en Investigaciones del Oriente                                                          |                          |

**Figure S1: ZERBINI Study Patient Sample Size Flowchart**

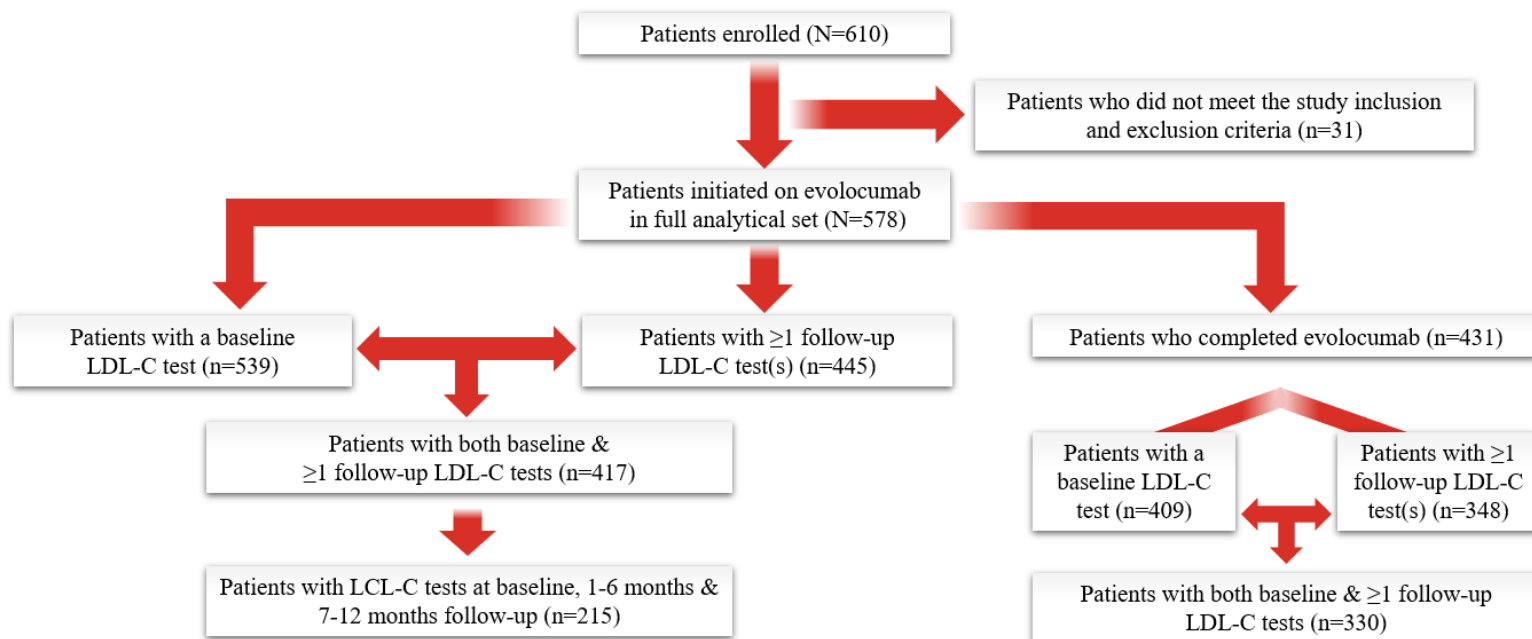

LDL-C: low-density lipoprotein cholesterol.

**Figure S2: Study Schema**

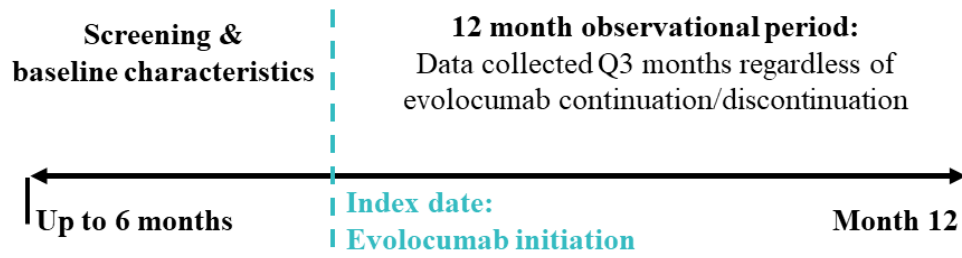

**Figure S3: Median LDL-C Concentrations at Baseline and Over Study Period in the Full Study Cohort (N=215)\***

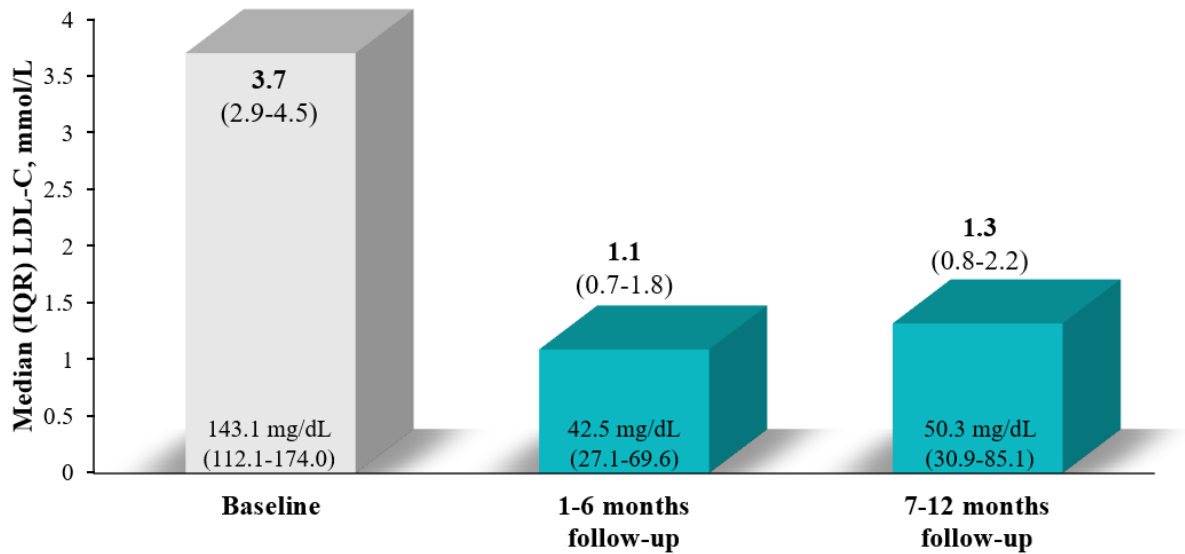

\*Data represent patients with an LDL-C measure at baseline (measured within 6 months prior to initiation of evolocumab) and their minimum LDL-C measure during the indicated timepoints over the 12-month follow-up period.

IQR: interquartile range; LDL-C: low-density lipoprotein cholesterol.

**Figure S4: Median LDL-C Concentrations at Baseline and Follow-up in Patients on Evolocumab Monotherapy (N=63)\***

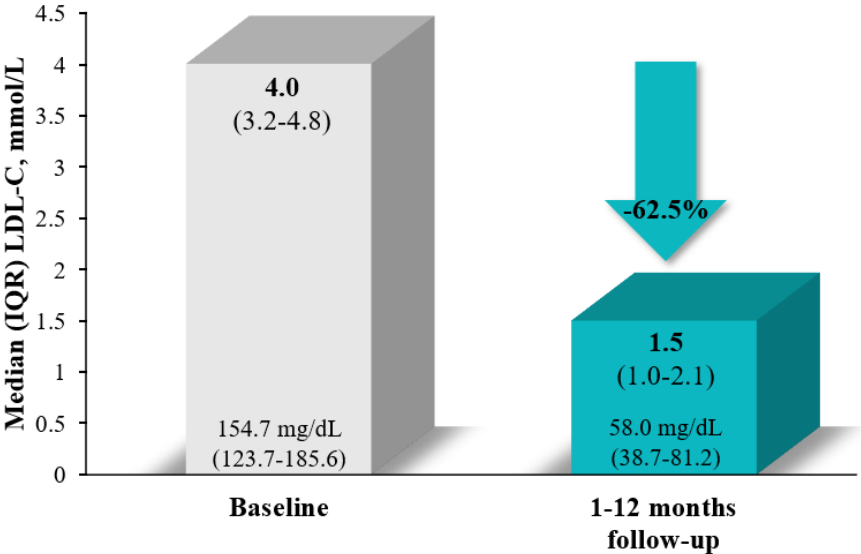

\*Data represent patients with an LDL-C measure at baseline (measured within 6 months prior to initiation of evolocumab) and their minimum LDL-C measure during the 12-month follow-up period.

IQR: interquartile range; LDL-C: low-density lipoprotein cholesterol.
